# Supplementary material
Source: Research Square preprint supplement (doi:10.21203/rs.3.rs-9452466/v1)
Supplement: Supplementary file 1 [file 3108af98daa310414d95711c.docx]

**Supplemental Material**

**Supp. Table1: ﻿﻿ Univariate Analysis of Clinical and Demographic Factors Associated with Disease Outcomes in Systemic Sclerosis.**

|  | **OR/β** | **95% CI** | **P** |
| --- | --- | --- | --- |
| **ILD** | | | |
| Anti-Topoisomerase I | 8.03 | 4.21–15.32 | <0.001 |
| Anti-Centromere | 0.12 | 0.07–0.20 | <0.001 |
| Diffuse Cutaneous SSc | 4.54 | 2.85–7.24 | <0.001 |
| Non-White Race/Ethnicity | 1.62 | 1.10–2.41 | 0.016 |
| Age (per year) | 1.01 | 0.99–1.02 | 0.342 |
| Female Sex | 0.38 | 0.16–0.90 | 0.027 |
| **mRSS** | | | |
| Anti-Topoisomerase I | +6.31 | 4.50 to 8.12 | <0.001 |
| Non-White Race/Ethnicity | +4.06 | 2.52 to 5.59 | <0.001 |
| Age (per year) | -0.14 | -0.20 to -0.08 | <0.001 |
| Anti-Centromere | -3.77 | -5.54 to -2.00 | <0.001 |
| Female Sex | -2.71 | -5.57 to 0.15 | 0.063 |
| **FVC %** | | | |
| Anti-Centromere | +18.42 | 13.72 to 23.12 | <0.001 |
| Diffuse Cutaneous SSc | -15.80 | -20.11 to -11.50 | <0.001 |
| Non-White Race/Ethnicity | -9.57 | -13.93 to -5.22 | <0.001 |
| Female Sex | +15.13 | 7.44 to 22.82 | <0.001 |
| Anti-Topoisomerase I | -11.43 | -16.42 to -6.43 | <0.001 |
| Age (per year) | +0.13 | -0.03 to 0.29 | 0.117 |
| **Total Medsger Score** | | | |
| Diffuse Cutaneous SSc | +2.64 | 2.15 to 3.13 | <0.001 |
| Anti-Topoisomerase I | +2.08 | 1.48 to 2.68 | <0.001 |
| Non-White Race/Ethnicity | +1.42 | 0.90 to 1.93 | <0.001 |
| Anti-Centromere | -1.42 | -2.00 to -0.84 | <0.001 |
| Age (per year) | -0.01 | -0.03 to 0.01 | 0.565 |
| Female Sex | -0.90 | -1.86 to 0.05 | 0.064 |
| **Medsger Score without Lung** | | | |
| Diffuse Cutaneous SSc | +2.10 | 1.67 to 2.53 | <0.001 |
| Anti-Topoisomerase I | +1.56 | 1.03 to 2.09 | <0.001 |
| Non-White Race/Ethnicity | +1.08 | 0.63 to 1.53 | <0.001 |
| Anti-Centromere | -0.69 | -1.21 to -0.18 | 0.009 |
| Age (per year) | -0.01 | -0.03 to 0.01 | 0.203 |
| Female Sex | -0.57 | -1.39 to 0.26 | 0.180 |
| **Abbreviations:** ILD = Interstitial Lung Disease; mRSS = modified Rodnan Skin Score; FVC = Forced Vital Capacity; SSc = Systemic Sclerosis; OR = Odds Ratio; β = Beta coefficient; CI = Confidence Interval.  **Note:** ILD used logistic regression; continuous outcomes used linear regression. Diffuse SSc not included in mRSS model due to multicollinearity. | | | |
